# Supplementary material
Source: PubMed Central journal article supplement (PMC5256140)
Supplement: jciinsight-2-89560-s001.pdf [file jciinsight-2-89560-s001.pdf]

## Supplementary Figures

A

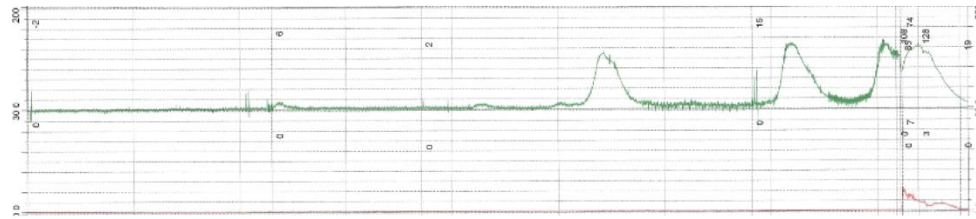

B

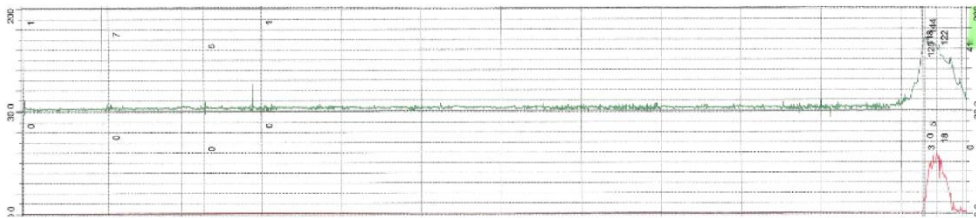

C

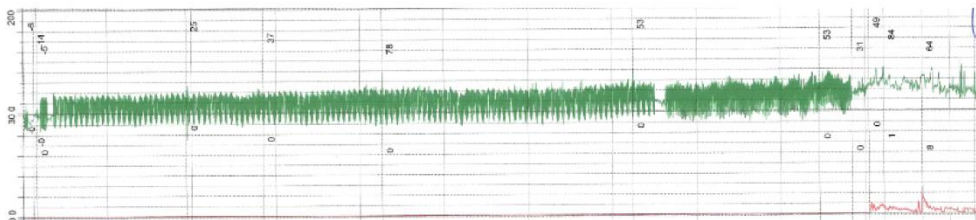

**Figure S1. Urodynamic recording of BOO-induced LUTD patients. (A)** DO group. BOO patients with increased detrusor pressure and reduced urine flow during pressure flow in combination with involuntary detrusor contractions during filling phase (phasic and/or terminal). **(B)** BO group. BOO patients without involuntary detrusor contractions during filling phase (phasic and/or terminal). **(C)** UA group. Patients where detrusor contractions could not be demonstrated during urodynamic study (underactive or acontractile detrusor). Shown are representative recordings from each patients' group.

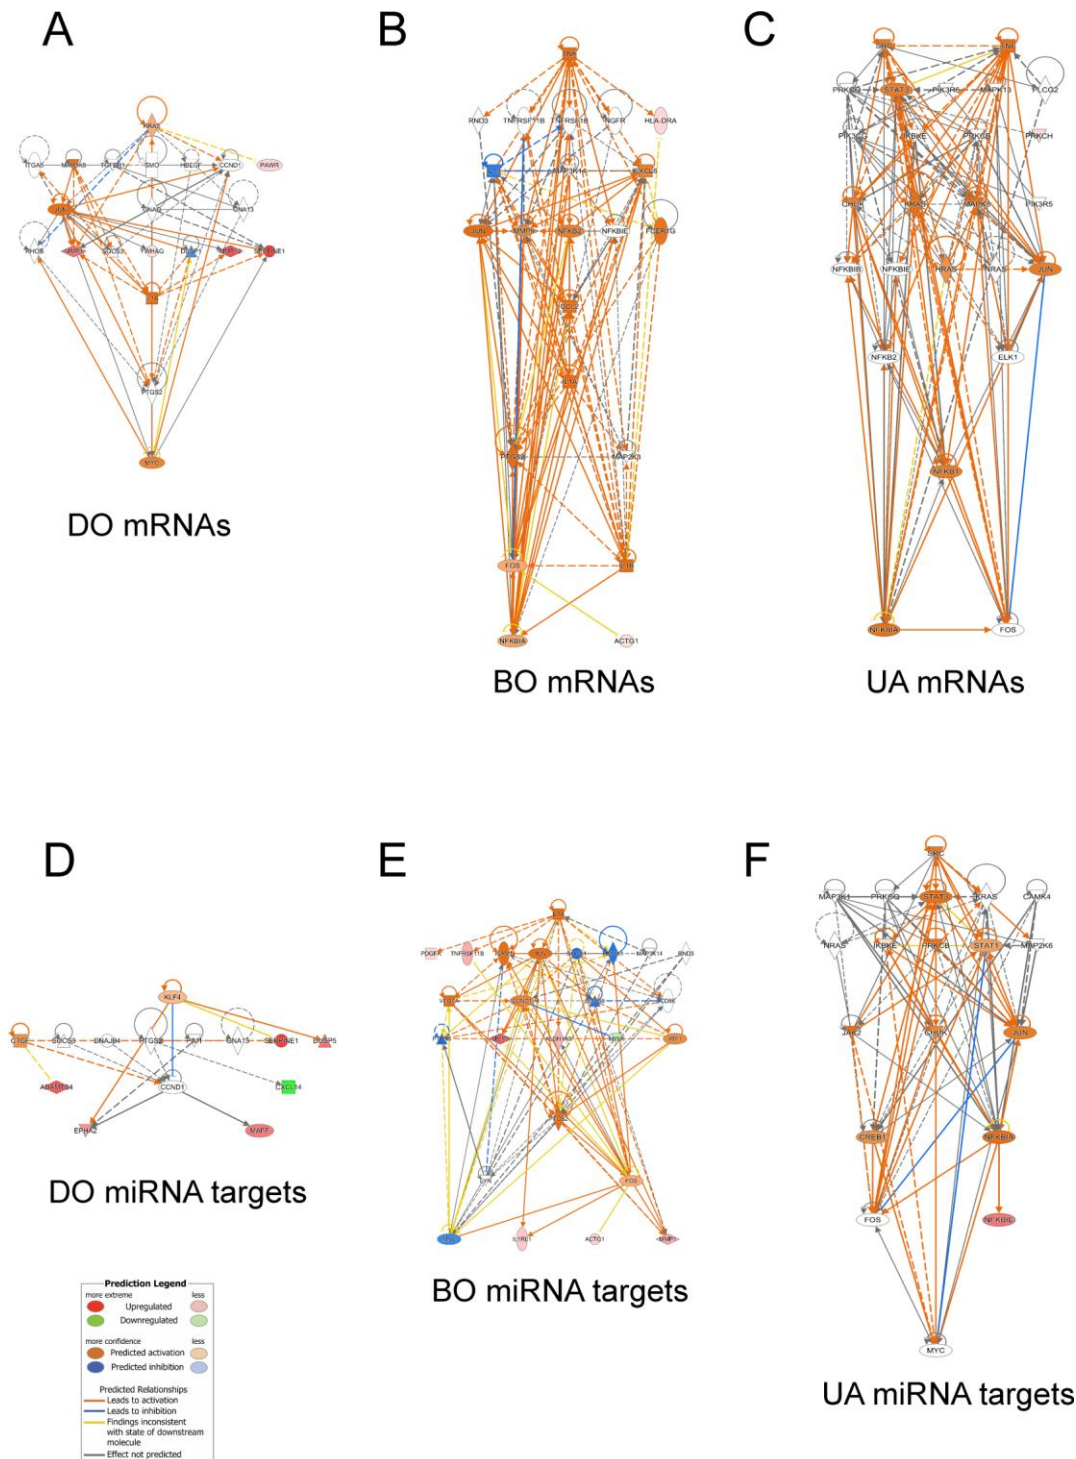

**Figure S2. Upstream regulator analysis of DO, BO and UA groups based on top 30 elements in mRNA-based and miRNA target-based pathways.** Upstream regulator analysis networks illustrating the interaction of top 30 pathway elements (mRNAs) in mRNA datasets or expressed miRNA targets datasets (miRNA targets) of patients' groups. **(A)** mRNA dataset of DO patients. JUN with 12 targets is the most interactive element. **(B)** mRNA dataset of BO patients. TNF with 21 targets in our mRNA dataset was the most interactive element. **(C)** mRNA dataset of UA patients. TNF with 11 targets was the most interactive element. **(D)** Expressed miRNA targets dataset of DO patients. KLF with 5 targets is the most interactive element. **(E)** Expressed miRNA targets dataset of BO patients. FOS with 16 targets in our mRNA dataset is the most interactive element. **(F)** Expressed miRNA targets dataset of UA patients. KRAS with 7 targets was the most interactive element.

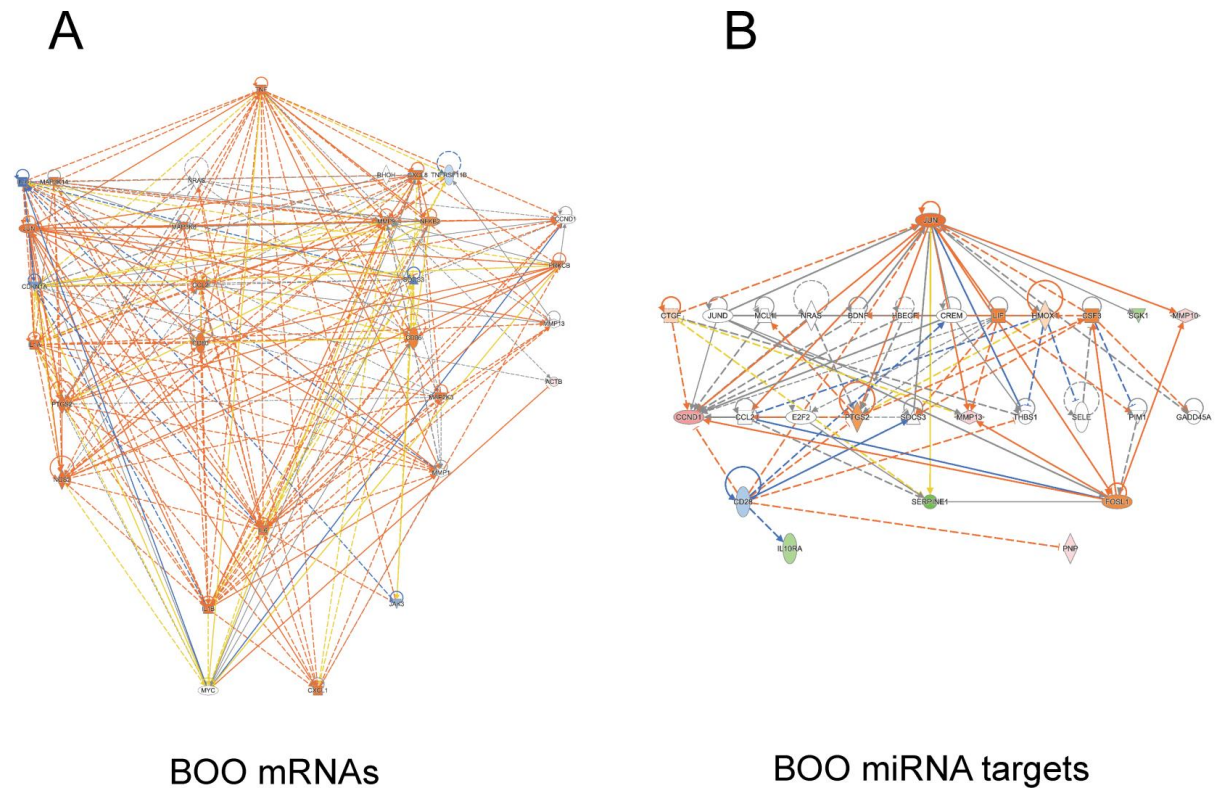

**Figure S3. Upstream regulator analysis of all BOO patients based on top 30 elements in mRNA-based and expressed miRNA target-based pathways. (A) mRNA dataset of all BOO patients. TNF was the most effective element. (B) Expressed miRNA targets dataset of abundant significant miRNAs in all BOO patients. JUN is the top upstream element.**

## Supplementary Tables

Table ST1. Urodynamic evaluation of patients with BOO-induced LUTD

| Sample | Sex | Age | Volume<br>desire to<br>void | Bladder<br>Capacity | Pdet<br>Qmax | Pdet max | Qmax | Retention | Retention<br>/<br>Capacity | Remarks         |
|--------|-----|-----|-----------------------------|---------------------|--------------|----------|------|-----------|----------------------------|-----------------|
| DO #1  | M   | 54  | 190                         | 335                 | 43           | 71       | 2    | 310       | 0.9                        |                 |
| DO #2  | M   | 70  | 210                         | 460                 | 68           | 76       | 7    | 160       | 0.3                        |                 |
| DO #3  | M   | 68  | 23                          | 322                 | 50           | 82       | 0    | 322       | 1.0                        |                 |
| DO #4  | M   | 62  | 80                          | 103                 | 103          | 106      | 9    | 5         | 0.0                        |                 |
| DO #5  | M   | 59  | 190                         | 385                 | 65           | 94       | 8    | 60        | 0.2                        |                 |
| DO #6  | M   | 61  | 50                          | 250                 | 100          | 180      | 6    | 170       | 0.7                        |                 |
| BO #1  | M   | 60  | 75                          | 590                 | 133          | 157      | 15   | 270       | 0.5                        |                 |
| BO #2  | M   | 63  | 190                         | 340                 | 68           | 70       | 6    | 190       | 0.6                        |                 |
| BO #3  | M   | 63  | 200                         | 490                 | 130          | 180      | 8    | 200       | 0.4                        |                 |
| BO #4  | M   | 76  | 395                         | 905                 | 51           | 65       | 5    | 480       | 0.5                        |                 |
| BO #5  | M   | 72  | 335                         | 530                 | 57           | 95       | 5    | 290       | 0.5                        |                 |
| BO #6  | M   | 69  | 130                         | 450                 | 90           | 99       | 6    | 115       | 0.3                        |                 |
| UA #1  | M   | 83  | 210                         | 741                 | 0            | 5        | 0    | 780       | 1.1                        | acontractile    |
| UA #2  | M   | 80  | 150                         | 560                 | 45           | 30       | 10   | 500       | 0.9                        | hypocontractile |
| UA #3  | M   | 71  | 450                         | 610                 | 0            | 0        | 0    | 610       | 1.0                        | acontractile    |
| UA #4  | M   | 80  | 470                         | 580                 | 0            | 0        | 0    | 580       | 1.0                        | acontractile    |
| UA #5  | M   | 65  | 305                         | 900                 | 32           | 36       | 13   | 425       | 0.5                        | hypocontractile |
| UA #6  | M   | 66  | 650                         | 1500                | 0            | 0        | 0    | 1500      | 1.0                        | acontractile    |

Groups (n = 6 patients per group): DO = BOO patients with uroynamically determined bladder overactivity, BO = BOO patients without bladder overactivity, UA = underactive bladder

Abbreviations: Pdet max = maximum detrusor pressure, Pdet Qmax = detrusor pressure at maximum flow, Qmax = maximum flow, Residual = post-void residual.

Table ST2. miRNAs and their targets encoding contractile and fibrotic proteins

|    | CNN1              | CTGF                        | HBEGF                       | HGF                       | JUNB              | MYC       | RND1    | SNAI1             | TGFB2                       | TGFBR1                      | TGIF2                      | VEGFA                                  |
|----|-------------------|-----------------------------|-----------------------------|---------------------------|-------------------|-----------|---------|-------------------|-----------------------------|-----------------------------|----------------------------|----------------------------------------|
| DO | 152-3p<br>199b-5p | 26b-5p                      | --                          | 26b-5p                    | 199b-5p           | --        | 199b-5p | 199b-5p           | 152-3p                      | --                          | 182-5p<br>486-3p           | 199b-5p<br>374a-5p                     |
| BO | 10a-5p            | 133a-3p<br>26b-5p<br>30c-5p | 145-5p<br>29c-3p            | 26b-5p                    | 199b-5p<br>30c-5p | 145-5p    | 199b-5p | 199b-5p<br>30c-5p | 133a-3p<br>145-5p<br>490-3p | 133a-3p<br>145-5p<br>490-3p | 497-5p<br>29c-3p<br>490-3p | 199b-5p<br>29c-3p<br>497-5p<br>199b-5p |
| UA | 15b-5p            | 26b-5p<br>30c-5p            | let-7b-5p<br>203a<br>29c-3p | 199a-3p<br>203a<br>26b-5p | 199b-5p<br>30c-5p | let-7b-5p | 199b-5p | 199b-5p<br>30c-5p | 199b-5p<br>203a<br>29c-3p   | let-7b-5p<br>320a           | 199a-3p<br>29c-3p          | 429<br>203a<br>29c-3p                  |

Table ST3. Test result variables: prediction probability

| Markers                | AUC <sup>1</sup> | Sensitivity | Specificity | Significance <sup>1</sup> | Lower Bound <sup>3</sup> | Upper Bound <sup>3</sup> |
|------------------------|------------------|-------------|-------------|---------------------------|--------------------------|--------------------------|
| <b>NRXN3</b>           | <b>0.93</b>      | 0.83        | 0.89        | 0.002                     | 0.83                     | 1                        |
| <b>BMP7</b>            | <b>0.95</b>      | 0.83        | 0.79        | 0.001                     | 0.87                     | 1                        |
| <b>UPK1A</b>           | <b>0.88</b>      | 0.83        | 0.79        | 0.006                     | 0.73                     | 1                        |
| <b>hsa-miR-103a-3p</b> | <b>0.86</b>      | 1.00        | 0.85        | 0.009                     | 0.70                     | 1                        |
| <b>hsa-miR-10a-3p</b>  | <b>0.81</b>      | 0.83        | 0.73        | 0.023                     | 0.56                     | 1                        |
| <b>hsa-miR-199a-3p</b> | <b>0.87</b>      | 1.00        | 0.73        | 0.008                     | 0.726                    | 1                        |

<sup>1</sup> AUC: Area Under the curve

<sup>2</sup> Null hypothesis: true area = 0.5

<sup>3</sup>(95% confidence interval (CI))

Table ST4. Urodynamic parameters of the patients included in the blinded study

| Diagnosis | Capacity (ml) | Pdet Qmax (cmH2O) | Residual (ml) | Qmax (ml/s) | BCI       | Number of contraction during filling |
|-----------|---------------|-------------------|---------------|-------------|-----------|--------------------------------------|
| BO        | 522.5+/-20    | 96.5+/-11         | 228.3+/-24    | 7.3+/-1     | 133.1+/-9 | 0                                    |
| DO        | 458+/-31      | 65+/-8            | 227.6+/-31    | 6.8+/-1     | 51.3+/-9  | 2.6+/-0.4                            |
| UA        | 873.8+/-78    | 13.1+/-4          | 811.1+/-76    | 2.1+/-1     | 8.7+/-4   | 0                                    |

Samples, processed in the blinded study, originated from BOO patients belonging to the following groups: DO = BOO patients with urodynamically determined bladder overactivity (n=13), BO = BOO patients without bladder overactivity (n=7), UA = underactive bladder patients (n=20). Shown are the group average values  $\pm$  SEM.

Abbreviations: Pdet max = maximum detrusor pressure, Pdet Qmax = detrusor pressure at maximum flow, Qmax = maximum flow, Residual = post-void residual, BCI = bladder contractility index ( $Pdet\ Qmax + 5 \times Qmax$ ).

Table ST5. Patients in blinded study, decoding based on the three-mRNA and three-miRNA signatures and urodynamic diagnosis

| Code  | Decode   | Diagnosis |
|-------|----------|-----------|
| BO01  | BO01_UA  | UA        |
| BO02  | BO02_UA  | UA        |
| BO03  | BO03_UA  | UA        |
| BO04  | BO04_UA  | UA        |
| BO05  | BO05_DO  | DO        |
| BO06  | BO06_DO  | DO        |
| BO07  | BO07_DO  | DO        |
| BO08  | BO08_BO  | BO        |
| BO09  | BO09_BO  | BO        |
| BO010 | BO010_UA | UA        |
| BO011 | BO011_UA | UA        |
| BO013 | BO013_UA | UA        |
| BO045 | BO045_BO | BO        |
| BO044 | BO044_BO | BO        |
| BO017 | BO017_UA | UA        |
| BO018 | BO018_UA | UA        |
| BO019 | BO019_UA | UA        |
| BO020 | BO020_UA | UA        |
| BO021 | BO021_DO | DO        |
| BO022 | BO022_DO | DO        |
| BO023 | BO023_DO | DO        |
| BO024 | BO024_DO | DO        |
| BO025 | BO025_UA | UA        |
| BO026 | BO026_UA | UA        |
| BO027 | BO027_UA | UA        |
| BO028 | BO028_UA | UA        |
| BO029 | BO029_UA | UA        |
| BO030 | BO030_UA | UA        |
| BO031 | BO031_DO | DO        |
| BO032 | BO032_DO | DO        |
| BO033 | BO033_BO | BO        |
| BO034 | BO034_BO | BO        |
| BO037 | BO037_DO | DO        |
| BO038 | BO038_DO | DO        |
| BO039 | BO039_DO | DO        |
| BO040 | BO040_DO | DO        |
| BO041 | BO041_UA | UA        |
| BO042 | BO042_UA | UA        |

Table ST6. Top 10 canonical pathways implicated in BOO patients' groups

| Pathways predicted based on mRNA dataset                              |               |         | Pathways predicted based on expressed miRNA targets |               |         |
|-----------------------------------------------------------------------|---------------|---------|-----------------------------------------------------|---------------|---------|
| Canonical Pathway Name                                                | -log(p-value) | z-score | Canonical Pathway Name                              | -log(p-value) | z-score |
| <b>DO</b>                                                             |               |         |                                                     |               |         |
| ERK5 Signaling                                                        | 6.88          | 2.828   | Protein Kinase A Signaling                          | 3.72          | -0.333  |
| PI3K/AKT Signaling                                                    | 4.43          | 1.89    | Sphingomyelin Metabolism                            | 3.13          | NaN     |
| Protein Kinase A Signaling                                            | 3.7           | 0.775   | RhoA Signaling                                      | 2.42          | NaN     |
| Colorectal Cancer Metastasis Signaling                                | 3.51          | 2.111   | PI3K/AKT Signaling                                  | 2.4           | NaN     |
| Cholecystokinin/Gastrin-mediated Signaling                            | 3.42          | 2.646   | GADD45 Signaling                                    | 2.36          | NaN     |
| Corticotropin Releasing Hormone Signaling                             | 3.17          | 1.342   | Pyridoxal 5'-phosphate Salvage Pathway              | 2.34          | NaN     |
| TGF- $\beta$ Signaling                                                | 2.99          | 2.449   | Cardiac $\beta$ -adrenergic Signaling               | 2.28          | 0       |
| Neuregulin Signaling                                                  | 2.97          | 1.342   | D-myo-inositol-5-phosphate Metabolism               | 2.14          | NaN     |
| IGF-1 Signaling                                                       | 2.75          | 1       | 3-phosphoinositide Degradation                      | 2.13          | NaN     |
| Wnt/ $\beta$ -catenin Signaling                                       | 2.74          | 0.816   | VDR/RXR Activation                                  | 2.1           | NaN     |
| <b>BO</b>                                                             |               |         |                                                     |               |         |
| Dendritic Cell Maturation                                             | 11.8          | 3.889   | ILK Signaling                                       | 5.54          | 1.941   |
| IL-6 Signaling                                                        | 11.3          | 3.4     | IL-6 Signaling                                      | 4.62          | 1.897   |
| Leukocyte Extravasation Signaling                                     | 9.79          | 3.128   | PPAR Signaling                                      | 4.58          | -2.333  |
| Production of Nitric Oxide and Reactive Oxygen Species in Macrophages | 8.9           | 2.117   | Acute Phase Response Signaling                      | 4.58          | 1.508   |
| CD28 Signaling in T Helper Cells                                      | 8.1           | 1.941   | IL-8 Signaling                                      | 4.22          | 3.464   |
| OX40 Signaling Pathway                                                | 8.09          | 0.378   | HMGB1 Signaling                                     | 3.75          | 2.828   |
| HMGB1 Signaling                                                       | 7.96          | 3.71    | Toll-like Receptor Signaling                        | 3.65          | 0.816   |
| PKC $\theta$ Signaling in T Lymphocytes                               | 7.39          | 2.4     | ERK5 Signaling                                      | 3.21          | 2.236   |
| ILK Signaling                                                         | 7.35          | 1       | CD40 Signaling                                      | 3.14          | 1.342   |
| MIF Regulation of Innate Immunity                                     | 6.94          | 1.732   | IGF-1 Signaling                                     | 2.93          | 0       |
| <b>UA</b>                                                             |               |         |                                                     |               |         |
| CD28 Signaling in T Helper Cells                                      | 14.4          | 5.603   | p53 Signaling                                       | 6.69          | 1.091   |
| B Cell Receptor Signaling                                             | 14            | 5.893   | Glioblastoma Multiforme Signaling                   | 6.61          | -0.354  |
| iCOS-iCOSL Signaling in T Helper Cells                                | 14            | 4.964   | B Cell Receptor Signaling                           | 6.4           | 4.768   |
| Role of NFAT in Regulation of the Immune Response                     | 13.8          | 5.68    | ERK5 Signaling                                      | 6.4           | 2.982   |
| Dendritic Cell Maturation                                             | 13.2          | 6.671   | IGF-1 Signaling                                     | 6.23          | 1.528   |
| PKC $\theta$ Signaling in T Lymphocytes                               | 12.7          | 5.598   | Estrogen-mediated S-phase Entry                     | 6.08          | 1.155   |
| Tec Kinase Signaling                                                  | 11.7          | 5.515   | Tec Kinase Signaling                                | 5.8           | 3.157   |
| Toll-like Receptor Signaling                                          | 11.5          | 4.131   | PI3K Signaling in B Lymphocytes                     | 5.61          | 3.286   |
| PI3K Signaling in B Lymphocytes                                       | 11.3          | 4.719   | IL-6 Signaling                                      | 5.59          | 4.271   |
| IL-6 Signaling                                                        | 10.9          | 5.357   | Cardiac Hypertrophy Signaling                       | 5.44          | 3.28    |

Table is sorted based on -log(p-value) of individual pathways, calculated using the right-tailed Fisher Exact Test. Positive z-score indicates activation and negative z-score represents inhibition of a pathway. Input - differentially expressed mRNAs and expressed miRNA targets of abundant regulated miRNAs (abs. fold change  $\geq 1.5$ , p-value  $< 0.05$  and adjusted p-value  $< 0.15$ ).

Table ST7. Top 10 canonical pathways using all BOO patients' datasets.

| Pathways predicted based on mRNA dataset                |               |         | Pathways predicted based on expressed miRNA targets |               |         |
|---------------------------------------------------------|---------------|---------|-----------------------------------------------------|---------------|---------|
| Canonical Pathway Name                                  | -log(p-value) | z-score | Canonical Pathway Name                              | -log(p-value) | z-score |
| HMGB1 Signaling                                         | 8.37          | 3.771   | HMGB1 Signaling                                     | 4.01          | 1.633   |
| IL-6 Signaling                                          | 7.04          | 3.153   | SAPK/JNK Signaling                                  | 3.72          | 0       |
| Acute Phase Response Signaling                          | 6.59          | 3.153   | ERK5 Signaling                                      | 3.62          | 2       |
| Role of IL-17F in Allergic Inflammatory Airway Diseases | 6.18          | 3.162   | Hepatic Fibrosis / Hepatic Stellate Cell Activation | 2.90          | NaN     |
| TREM1 Signaling                                         | 5.56          | 2       | Colorectal Cancer Metastasis Signaling              | 2.90          | 1.414   |
| Colorectal Cancer Metastasis Signaling                  | 5.41          | 3.411   | Bladder Cancer Signaling                            | 2.97          | NaN     |
| Leukocyte Extravasation Signaling                       | 4.93          | 3.5     | NRF2-mediated Oxidative Stress Response             | 2.94          | 1.89    |
| B Cell Receptor Signaling                               | 4.58          | 4.123   | IL-8 Signaling                                      | 2.88          | 1.89    |
| Dendritic Cell Maturation                               | 4.48          | 3.5     | p53 Signaling                                       | 2.74          | NaN     |
| p53 Signaling                                           | 4.35          | 1.134   | HIF1 $\alpha$ Signaling                             | 2.66          | NaN     |

Table is sorted based on -log(p-value) of individual pathways, calculated using the right-tailed Fisher Exact Test. Positive z-score indicates activation and negative z-score represents inhibition of a pathway. Input - differentially expressed mRNAs and expressed miRNA targets of abundant regulated miRNAs (abs. fold change  $\geq 1.5$ , p-value  $< 0.05$  and adjusted p-value  $< 0.15$ ).

## Supplementary figure legends

### Figure S1. Urodynamic recording of BOO-induced LUTD patients

- (A) DO group. BOO patients with increased detrusor pressure and reduced urine flow during pressure flow in combination with involuntary detrusor contractions during filling phase (phasic and/or terminal).
- (B) BO group. BOO patients without involuntary detrusor contractions during filling phase (phasic and/or terminal).
- (C) UA group. Patients where detrusor contractions could not be demonstrated during urodynamic study (underactive or acontractile detrusor). Shown are representative recordings from each patients' group.

### Figure S2. Upstream regulator analysis of DO, BO and UA groups based on top 30 elements in mRNA-based and miRNA target-based pathways

Upstream regulator analysis networks illustrating the interaction of top 30 pathway elements (mRNAs) in mRNA datasets or expressed miRNA targets datasets (miRNA targets) of patients' groups.

- (A) mRNA dataset of DO patients. JUN with 12 targets in our mRNA dataset was the most interactive element. KRAS with 9 ILA1 with 8 MYC with 7 and MAP3K8 with 5 targets were among top targeting pathway element in DO mRNA dataset.
- (B) mRNA dataset of BO patients. TNF with 21 targets in our mRNA dataset was the most interactive element.
- (C) mRNA dataset of UA patients. TNF with 11 targets was the most interactive element. TNF and NFKBIA were predicted to be activated.
- (D) Expressed miRNA targets dataset of DO patients. KLF with 5 targets in our mRNA dataset was the most interactive element. KLF and CTGF were predicted to be activated.
- (E) Expressed miRNA targets dataset of BO patients. FOS with 16 targets in our mRNA dataset was the most interactive element.
- (F) Expressed miRNA targets dataset of UA patients. KRAS with 7 targets was the most interactive element. STAT3, JAK2 and NFKBIA were predicted to be activated.

### Figure S3. Upstream regulator analysis of all BOO patients based on top 30 elements in mRNA-based and expressed miRNA target-based pathways

- (A) mRNA dataset of all BOO patients. TNF was the most effective element.
- (B) Expressed miRNA targets dataset of abundant significant miRNAs in all BOO patients. JUN is the top upstream element.
